# Supplementary material
Source: PubMed Central journal article supplement (PMC4747611)
Supplement: supp_jiv326_jiv326supp_fig1.pdf [file supp_jiv326_jiv326supp_fig1.pdf]

**REDS-III Brazil Dengue Study**  
**Version – 2013-12-19**  
**Medical Record Abstraction Form (English)**

**Affix Label with: Hospital ID, Study ID,  
and Start & End Dates**

**Section A – Participant Information**

*Complete this section using the medical record for the patient with this Study ID.*

|     |                                                                      |                                                                       |                  |
|-----|----------------------------------------------------------------------|-----------------------------------------------------------------------|------------------|
| A1  | Date of Record Abstraction:                                          | _ _ / _ _ / _ _ _ _ <br>DD MM CCYY                                    |                  |
| A2  | Abstractor Initials:                                                 | _ _ _ _                                                               | Signature: _____ |
| A3  | Abstraction Start Time:  _ _ : _ _  (24 hour)<br>HH MM               | Abstraction End Time:  _ _ : _ _  (24 hour)<br>HH MM                  |                  |
| A4  | Hospital:                                                            | Hemope .....01 HUOC .....02<br>Procape .....03 Hemorio .....04        | _ _              |
| A5  | City:                                                                | Recife .....01 Rio de Janeiro .....02                                 | _ _              |
| A6  | Was patient admitted to the hospital or seen at an outpatient visit? | Yes .....01<br>No .....02 → Go to A7                                  | _ _              |
| A6a | How many times?                                                      | _ _  times                                                            |                  |
| A6b | Date of <u>F</u> irst Inpatient Admission or Outpatient Visit:       | _ _ / _ _ / _ _ _ _ <br>DD MM CCYY                                    |                  |
| A6c | Date of <u>F</u> irst Inpatient Discharge:                           | _ _ / _ _ / _ _ _ _ <br>DD MM CCYY                                    |                  |
| A6d | Date of <u>L</u> ast Inpatient Admission or Outpatient Visit:        | _ _ / _ _ / _ _ _ _ <br>DD MM CCYY                                    |                  |
| A6e | Date of <u>L</u> ast Inpatient Discharge:                            | _ _ / _ _ / _ _ _ _ <br>DD MM CCYY                                    |                  |
| A7  | Patient vital status at end of last hospitalization/outpatient visit | Alive .....01 → Go to A8<br>Dead .....02<br>Unknown.....03 → Go to A8 | _ _              |
| A7a | If dead, date of death                                               | _ _ / _ _ / _ _ _ _ <br>DD MM CCYY                                    |                  |
| A8  | Patient's blood type                                                 | A .....01 O .....02<br>B .....03 AB .....04                           | _ _              |
| A9  | Patient's Rh factor                                                  | Positive (+) .....01<br>Negative (-) .....02                          | _ _              |

**REDS-III Brazil Dengue Study**  
**Version – 2013-12-19**  
**Medical Record Abstraction Form (English)**

**Affix Label with: Hospital ID, Study ID,  
and Start & End Dates**

**SECTION B - Signs and Symptoms**

The following questions related to clinical signs and symptoms, including complaints provided by the patient and or presentations in the patient after admission to the hospital. **Consider THE TIME PERIOD listed at the top of each page.**

|     |                                                                                                                                                                                       |                                                                         |                                              |
|-----|---------------------------------------------------------------------------------------------------------------------------------------------------------------------------------------|-------------------------------------------------------------------------|----------------------------------------------|
| B1  | Does the medical record contain statements of suspected <b>dengue</b> <u>during</u> the period defined by the study?                                                                  | Yes .....01<br>No .....02<br>Don't Know .....97                         | _ _                                          |
| B2  | Does the medical record contain statements of suspected <b>dengue</b> <u>prior</u> to the period defined by the study (on or after <u>December 1, 2011</u> )?                         | Yes .....01<br>No .....02 → Go to B3<br>Don't Know .....97 → Go to B3   | _ _                                          |
| B2a | If yes, when?                                                                                                                                                                         | _ _ / _ _ / _ _ _ _ <br>DD MM CCYY                                      | Comments:                                    |
| B3  | What was/were the primary diagnosis codes (ICD-10) at time of discharge from the hospital <u>or</u> the billing code/s for each outpatient visit/consultation? For up to 5 occasions? | 1 -  _ _ _ _ . _ _  Date:  _ _ / _ _ /2012                              |                                              |
|     |                                                                                                                                                                                       | 2 -  _ _ _ _ . _ _  Date:  _ _ / _ _ /2012                              |                                              |
|     |                                                                                                                                                                                       | 3 -  _ _ _ _ . _ _  Date:  _ _ / _ _ /2012                              |                                              |
|     |                                                                                                                                                                                       | 4 -  _ _ _ _ . _ _  Date:  _ _ / _ _ /2012                              |                                              |
|     |                                                                                                                                                                                       | 5 -  _ _ _ _ . _ _  Date:  _ _ / _ _ /2012                              |                                              |
| B4  | Is this patient HIV+?                                                                                                                                                                 | Yes .....01<br>No .....02<br>Don't Know .....97                         | _ _                                          |
| B5  | Has this patient ever had an organ/tissue/bone marrow transplant?                                                                                                                     | Yes .....01<br>No .....02 → Go to B7<br>Don't Know .....97 → Go to B6   | _ _                                          |
| B5a | If yes, what type and when?                                                                                                                                                           | Organ/s: _____<br>_____                                                 | Date:<br> _ _ / _ _ / _ _ _ _ <br>DD MM CCYY |
| B6  | Was this patient on treatment for transplantation?                                                                                                                                    | Yes .....01<br>No .....02 → Go to B7<br>Don't Know .....97 → Go to B7   | _ _                                          |
| B7  | Was this patient on treatment for cancer (chemotherapy/radiation)?                                                                                                                    | Yes .....01<br>No .....02 → Go to B8<br>Don't Know .....97 → Go to B8   | _ _                                          |
| B8  | Was this patient ever diagnosed with myelodysplasia?                                                                                                                                  | Yes .....01<br>No .....02 → Go to B9<br>Don't Know .....97 → Go to B9   | _ _                                          |
| B9  | Was this patient on treatment with corticosteroids?                                                                                                                                   | Yes .....01<br>No .....02 → Go to B10<br>Don't Know .....97 → Go to B10 | _ _                                          |

**REDS-III Brazil Dengue Study**  
**Version – 2013-12-19**  
**Medical Record Abstraction Form (English)**

**Affix Label with: Hospital ID, Study ID,  
and Start & End Dates**

**Vital Signs**

*(if there are more than 10 dates with these test results, complete B10 on the supplemental abstraction form)*

| B10 | Vital Signs<br>(MM/DD/CCYY) | Minimum<br>Temperature<br>(°C) | Maximum<br>Temperature<br>(°C) | Minimum<br>Blood Pressure<br>(S/D, mmHg) | Maximum<br>Blood Pressure<br>(S/D, mmHg) |
|-----|-----------------------------|--------------------------------|--------------------------------|------------------------------------------|------------------------------------------|
| 1   | _ _ / _ _ /2012             | _ _ _ . _                      | _ _ _ . _                      | _ _ _ <br> _ _ _                         | _ _ _ <br> _ _ _                         |
| 2   | _ _ / _ _ /2012             | _ _ _ . _                      | _ _ _ . _                      | _ _ _ <br> _ _ _                         | _ _ _ <br> _ _ _                         |
| 3   | _ _ / _ _ /2012             | _ _ _ . _                      | _ _ _ . _                      | _ _ _ <br> _ _ _                         | _ _ _ <br> _ _ _                         |
| 4   | _ _ / _ _ /2012             | _ _ _ . _                      | _ _ _ . _                      | _ _ _ <br> _ _ _                         | _ _ _ <br> _ _ _                         |
| 5   | _ _ / _ _ /2012             | _ _ _ . _                      | _ _ _ . _                      | _ _ _ <br> _ _ _                         | _ _ _ <br> _ _ _                         |
| 6   | _ _ / _ _ /2012             | _ _ _ . _                      | _ _ _ . _                      | _ _ _ <br> _ _ _                         | _ _ _ <br> _ _ _                         |
| 7   | _ _ / _ _ /2012             | _ _ _ . _                      | _ _ _ . _                      | _ _ _ <br> _ _ _                         | _ _ _ <br> _ _ _                         |
| 8   | _ _ / _ _ /2012             | _ _ _ . _                      | _ _ _ . _                      | _ _ _ <br> _ _ _                         | _ _ _ <br> _ _ _                         |
| 9   | _ _ / _ _ /2012             | _ _ _ . _                      | _ _ _ . _                      | _ _ _ <br> _ _ _                         | _ _ _ <br> _ _ _                         |
| 10  | _ _ / _ _ /2012             | _ _ _ . _                      | _ _ _ . _                      | _ _ _ <br> _ _ _                         | _ _ _ <br> _ _ _                         |

|      |                                                                                                                                                    |                                                                         |     |
|------|----------------------------------------------------------------------------------------------------------------------------------------------------|-------------------------------------------------------------------------|-----|
| B11  | Did this patient <u>report</u> having a fever on 2 or more consecutive days <u>on or before</u> this admission/outpatient consultation?            | Yes .....01<br>No .....02 → Go to B12<br>Don't Know .....97 → Go to B12 | _ _ |
| B11a | If yes, on how many days?                                                                                                                          | _ _  days                                                               |     |
| B12  | Were there objective measurements to show that this patient had fever on 2 or more consecutive days during this admission/outpatient consultation? | Yes .....01<br>No .....02 → Go to B13<br>Don't Know .....97 → Go to B13 | _ _ |
| B12a | If yes, on how many days?                                                                                                                          | _ _  days                                                               |     |
| B13  | Was a tourniquet test performed during the medical record abstraction time period?                                                                 | Yes .....01<br>No .....02 → Go to B14<br>Don't Know .....97 → Go to B14 | _ _ |
| B13a | If yes, what are results of tourniquet test?                                                                                                       | Positive .....01<br>Negative.....02<br>Don't Know .....97               | _ _ |

**REDS-III Brazil Dengue Study**  
**Version – 2013-12-19**  
**Medical Record Abstraction Form (English)**

**Affix Label with: Hospital ID, Study ID,  
and Start & End Dates**

**Signs and Symptoms:**

*Complete this table using information from all sources within the medical record, during the time period specified.*

|      | <b>Did this patient complain about/present or have...</b>   | <b>Yes</b>               | <b>No/Not Found in MR</b>             | <b>When did this symptom begin?</b> | <b>Observations or comments in the notes (please provide as much detail as available)</b> |
|------|-------------------------------------------------------------|--------------------------|---------------------------------------|-------------------------------------|-------------------------------------------------------------------------------------------|
| B14  | joint pain?                                                 | <input type="checkbox"/> | <input type="checkbox"/>              | _ _ / _ _ /2012                     | <i>If present, specify the locations at which pain occurred:</i>                          |
| B15  | muscle pain?                                                | <input type="checkbox"/> | <input type="checkbox"/>              | _ _ / _ _ /2012                     | <i>If present, specify the locations at which pain occurred:</i>                          |
| B16  | bone pain?                                                  | <input type="checkbox"/> | <input type="checkbox"/>              | _ _ / _ _ /2012                     | <i>If present, specify the locations at which pain occurred:</i>                          |
| B17  | painful eyes (pain behind the eyes or on moving your eyes)? | <input type="checkbox"/> | <input type="checkbox"/>              | _ _ / _ _ /2012                     |                                                                                           |
| B18  | headache?                                                   | <input type="checkbox"/> | <input type="checkbox"/>              | _ _ / _ _ /2012                     |                                                                                           |
| B19  | erythema?                                                   | <input type="checkbox"/> | <input type="checkbox"/>              | _ _ / _ _ /2012                     |                                                                                           |
| B20  | chills?                                                     | <input type="checkbox"/> | <input type="checkbox"/>              | _ _ / _ _ /2012                     |                                                                                           |
| B21  | malaise?                                                    | <input type="checkbox"/> | <input type="checkbox"/>              | _ _ / _ _ /2012                     |                                                                                           |
| B22  | vomiting?                                                   | <input type="checkbox"/> | <input type="checkbox"/><br>Go to B23 | _ _ / _ _ /2012                     |                                                                                           |
| B22a | If vomiting, was blood in the vomit?                        | <input type="checkbox"/> | <input type="checkbox"/>              | _ _ / _ _ /2012                     |                                                                                           |
| B23  | diarrhea (4 or more watery loose stools in one day)?        | <input type="checkbox"/> | <input type="checkbox"/>              | _ _ / _ _ /2012                     |                                                                                           |
| B24  | tar-like stool or red blood in stool?                       | <input type="checkbox"/> | <input type="checkbox"/>              | _ _ / _ _ /2012                     |                                                                                           |
| B25  | cough?                                                      | <input type="checkbox"/> | <input type="checkbox"/>              | _ _ / _ _ /2012                     |                                                                                           |

**REDS-III Brazil Dengue Study**  
**Version – 2013-12-19**  
**Medical Record Abstraction Form (English)**

**Affix Label with: Hospital ID, Study ID,  
and Start & End Dates**

|     | <b>Did this patient complain about/present or have...</b>                                                        | <b>Yes</b>               | <b>No/Not Found in MR</b> | <b>When did this symptom begin?</b> | <b>Observations or comments in the notes (<i>please provide as much detail as available</i>)</b> |
|-----|------------------------------------------------------------------------------------------------------------------|--------------------------|---------------------------|-------------------------------------|--------------------------------------------------------------------------------------------------|
| B26 | conjunctivitis?                                                                                                  | <input type="checkbox"/> | <input type="checkbox"/>  | _ _ / _ _ /2012                     |                                                                                                  |
| B27 | nasal congestion?                                                                                                | <input type="checkbox"/> | <input type="checkbox"/>  | _ _ / _ _ /2012                     |                                                                                                  |
| B28 | sore throat?                                                                                                     | <input type="checkbox"/> | <input type="checkbox"/>  | _ _ / _ _ /2012                     |                                                                                                  |
| B29 | jaundice?                                                                                                        | <input type="checkbox"/> | <input type="checkbox"/>  | _ _ / _ _ /2012                     |                                                                                                  |
| B30 | seizures?                                                                                                        | <input type="checkbox"/> | <input type="checkbox"/>  | _ _ / _ _ /2012                     |                                                                                                  |
| B31 | easy bruising or hematomas?                                                                                      | <input type="checkbox"/> | <input type="checkbox"/>  | _ _ / _ _ /2012                     |                                                                                                  |
| B32 | nose bleeding?                                                                                                   | <input type="checkbox"/> | <input type="checkbox"/>  | _ _ / _ _ /2012                     |                                                                                                  |
| B33 | mild bleeding or petechiae (e.g., nose or gum bleeds, red or purple spots on patches of skin, or easy bruising)? | <input type="checkbox"/> | <input type="checkbox"/>  | _ _ / _ _ /2012                     |                                                                                                  |
| B34 | rash?                                                                                                            | <input type="checkbox"/> | <input type="checkbox"/>  | _ _ / _ _ /2012                     | <i>If yes, specify location</i>                                                                  |
| B35 | blood in urine?                                                                                                  | <input type="checkbox"/> | <input type="checkbox"/>  | _ _ / _ _ /2012                     |                                                                                                  |
| B36 | <u>if female</u> , vaginal bleeding (more than usual)?                                                           | <input type="checkbox"/> | <input type="checkbox"/>  | _ _ / _ _ /2012                     | <i>If yes, please provide as much detail as possible with respect to menstrual cycle.</i>        |
| B37 | any neurological symptoms such as agitation or lethargy?                                                         | <input type="checkbox"/> | <input type="checkbox"/>  | _ _ / _ _ /2012                     |                                                                                                  |
| B38 | cyanosis?                                                                                                        | <input type="checkbox"/> | <input type="checkbox"/>  | _ _ / _ _ /2012                     |                                                                                                  |
| B39 | hepatic insufficiency?                                                                                           | <input type="checkbox"/> | <input type="checkbox"/>  | _ _ / _ _ /2012                     |                                                                                                  |
| B40 | have preexisting coagulopathies?                                                                                 | <input type="checkbox"/> | <input type="checkbox"/>  | _ _ / _ _ /2012                     |                                                                                                  |
| B41 | patient presented coagulation alterations?                                                                       | <input type="checkbox"/> | <input type="checkbox"/>  | _ _ / _ _ /2012                     |                                                                                                  |

**REDS-III Brazil Dengue Study**  
**Version – 2013-12-19**  
**Medical Record Abstraction Form (English)**

Affix Label with: Hospital ID, Study ID,  
and Start & End Dates

|      | <b>Did this patient complain about/present or have...</b> | <b>Yes</b>                                                                            | <b>No/Not Found in MR</b>             | <b>When did this symptom begin?</b> | <b>Observations or comments in the notes<br/>(please provide as much detail as available)</b> |
|------|-----------------------------------------------------------|---------------------------------------------------------------------------------------|---------------------------------------|-------------------------------------|-----------------------------------------------------------------------------------------------|
| B42  | coagulation alterations during this admission?            | <input type="checkbox"/>                                                              | <input type="checkbox"/>              | _ _ / _ _ /2012                     |                                                                                               |
| B43  | pleural effusions?                                        | <input type="checkbox"/>                                                              | <input type="checkbox"/><br>Go to B44 | _ _ / _ _ /2012                     |                                                                                               |
| B43a | If yes, how were effusions diagnosed?                     | Auscultation .....01 → Go to B44<br>Percussion .....02 → Go to B44<br>Imaging .....03 |                                       |                                     | _ _                                                                                           |
| B43b | Type of imaging?                                          | _____                                                                                 |                                       |                                     |                                                                                               |
| B44  | ascites?                                                  | <input type="checkbox"/>                                                              | <input type="checkbox"/>              | _ _ / _ _ /2012                     |                                                                                               |

Other: Any other comments you wish to make concerning the patient’s medical record during the time period of the abstraction?

---

---

---

---

---

---

---

---

---

---

**REDS-III Brazil Dengue Study**  
**Version – 2013-12-19**  
**Medical Record Abstraction Form (English)**

Affix Label with: Hospital ID, Study ID,  
and Start & End Dates

**Laboratory Tests Results**

Record data on all complete blood count (CBC - hemogram) results for this patient.

*(if there are more than 10 dates with these test results, complete B45 on the supplemental abstraction form)*

| B45 | Test Results by Date<br>(DD/MM/CCYY) | Red cell x 10 <sup>5</sup> | Hb<br>(g/dL) | Ht (%) | RDW fL | WBC x10 <sup>3</sup> | Lympho-<br>cytes (%) | Atypical<br>Lympho (%) | Mono-<br>cytes (%) | Platelets x 10 <sup>3</sup> |
|-----|--------------------------------------|----------------------------|--------------|--------|--------|----------------------|----------------------|------------------------|--------------------|-----------------------------|
| 1   | _ _ / _ _ /2012                      | _ _ _ _                    | _ _          | _ _    | _ _ _  | _ _ _                | _ _                  | _ _                    | _ _                | _ _ _ _                     |
| 2   | _ _ / _ _ /2012                      | _ _ _ _                    | _ _          | _ _    | _ _ _  | _ _ _                | _ _                  | _ _                    | _ _                | _ _ _ _                     |
| 3   | _ _ / _ _ /2012                      | _ _ _ _                    | _ _          | _ _    | _ _ _  | _ _ _                | _ _                  | _ _                    | _ _                | _ _ _ _                     |
| 4   | _ _ / _ _ /2012                      | _ _ _ _                    | _ _          | _ _    | _ _ _  | _ _ _                | _ _                  | _ _                    | _ _                | _ _ _ _                     |
| 5   | _ _ / _ _ /2012                      | _ _ _ _                    | _ _          | _ _    | _ _ _  | _ _ _                | _ _                  | _ _                    | _ _                | _ _ _ _                     |
| 6   | _ _ / _ _ /2012                      | _ _ _ _                    | _ _          | _ _    | _ _ _  | _ _ _                | _ _                  | _ _                    | _ _                | _ _ _ _                     |
| 7   | _ _ / _ _ /2012                      | _ _ _ _                    | _ _          | _ _    | _ _ _  | _ _ _                | _ _                  | _ _                    | _ _                | _ _ _ _                     |
| 8   | _ _ / _ _ /2012                      | _ _ _ _                    | _ _          | _ _    | _ _ _  | _ _ _                | _ _                  | _ _                    | _ _                | _ _ _ _                     |
| 9   | _ _ / _ _ /2012                      | _ _ _ _                    | _ _          | _ _    | _ _ _  | _ _ _                | _ _                  | _ _                    | _ _                | _ _ _ _                     |
| 10  | _ _ / _ _ /2012                      | _ _ _ _                    | _ _          | _ _    | _ _ _  | _ _ _                | _ _                  | _ _                    | _ _                | _ _ _ _                     |
